# Supplementary material
Source: PubMed Central journal article supplement (PMC6145661)
Supplement: jamacardiol-3-563-s001.pdf [file jamacardiol-3-563-s001.pdf]

## Supplementary Online Content

Groeneveld PW, Medvedeva E, Walker L, Segal AG, Richardson DM, Epstein AJ. Outcomes of care for ischemic heart disease and chronic heart failure in the Veterans Health Administration. *JAMA Cardiol*. Published online May 16, 2018. doi:10.1001/jamacardio.2018.1115

**eTable.** Survival Model Coefficients for Ischemic Heart Disease and Chronic Heart Failure Cohorts

This supplementary material has been provided by the authors to give readers additional information about their work.

**eTable. Survival Model Coefficients for Ischemic Heart Disease and Chronic Heart Failure Cohorts**

| Characteristic                                            | IHD                   |         | CHF                   |         |
|-----------------------------------------------------------|-----------------------|---------|-----------------------|---------|
|                                                           | Hazard Ratio (95% CI) | P-value | Hazard Ratio (95% CI) | P-value |
| Age                                                       | 1.04* (1.04, 1.05)    | <0.001  | 1.03* (1.03, 1.04)    | <0.001  |
| Female gender                                             | 1.08 (1.03, 1.12)     | <0.001  | 1.10 (1.06, 1.15)     | <0.001  |
| Date entering cohort <sup>†</sup>                         |                       |         |                       |         |
| April 1, 2010 – September 30, 2010                        | Comparator group      |         |                       |         |
| July 1, 2010 – September 30, 2010                         | 0.80 (0.75, 0.86)     | <0.001  | 0.94 (0.87, 1.01)     | 0.08    |
| October 1, 2010 – September 30, 2011                      | 0.96 (0.94, 0.98)     | <0.001  | 0.95 (0.93, 0.97)     | <0.001  |
| October 1, 2011 – September 30, 2012                      | 0.89 (0.88, 0.91)     | <0.001  | 0.90 (0.88, 0.92)     | <0.001  |
| October 1, 2012 – September 30, 2013                      | 0.88 (0.86, 0.89)     | <0.001  | 0.90 (0.88, 0.92)     | 0.001   |
| October 1, 2013 – September 30, 2014                      | 0.85 (0.83, 0.86)     | <0.001  | 0.88 (0.86, 0.90)     | <0.001  |
| Non-VA (Medicare-reimbursed) health care (%) <sup>‡</sup> |                       |         |                       |         |
| Non-Medicare enrollees                                    | Comparator group      |         |                       |         |
| 0 to <20%                                                 | 0.83 (0.82, 0.84)     | <0.001  | 0.85 (0.84, 0.86)     | <0.001  |
| 20% to <80%                                               | 0.91 (0.90, 0.92)     | <0.001  | 1.10 (1.08, 1.12)     | <0.001  |
| 80% to 100%                                               | 1.40 (1.38, 1.41)     | <0.001  | 1.42 (1.39, 1.44)     | <0.001  |

| Clinical comorbidities                        |                   |        |                   |        |
|-----------------------------------------------|-------------------|--------|-------------------|--------|
| Alcohol abuse                                 | 1.15 (1.13, 1.17) | <0.001 | 1.06 (1.04, 1.08) | <0.001 |
| Blood loss anemia                             | 0.89 (0.86, 0.91) | <0.001 | 0.92 (0.89, 0.96) | <0.001 |
| Cerebrovascular disease without recent stroke | 1.12 (1.10, 1.13) | <0.001 | 1.12 (1.10, 1.14) | <0.001 |
| Chronic heart failure                         | 1.63 (1.61, 1.64) | <0.001 | N/A               | N/A    |
| Chronic kidney disease                        | 1.23 (1.22, 1.25) | <0.001 | 1.26 (1.24, 1.27) | <0.001 |
| Chronic liver disease                         | 1.64 (1.61, 1.67) | <0.001 | 1.46 (1.43, 1.96) | <0.001 |
| Chronic peptic ulcer disease                  | 0.88 (0.79, 0.98) | 0.02   | 0.81 (0.71, 0.93) | 0.003  |
| Chronic pulmonary disease                     | 1.31 (1.30, 1.32) | <0.001 | 1.19 (1.18, 1.20) | <0.001 |
| Coagulation disorders                         | 1.12 (1.11, 1.14) | <0.001 | 1.12 (1.10, 1.14) | <0.001 |
| Deficiency anemias                            | 1.21 (1.20, 1.22) | <0.001 | 1.13 (1.11, 1.14) | <0.001 |
| Dementia                                      | 2.20 (2.18, 2.23) | <0.001 | 1.88 (1.85, 1.91) | <0.001 |
| Depression                                    | 0.97 (0.96, 0.98) | <0.001 | 0.95 (0.93, 0.96) | <0.001 |
| Diabetes with chronic complications           | 1.11 (1.10, 1.12) | <0.001 | 1.07 (1.05, 1.08) | <0.001 |
| Diabetes without chronic complications        | 1.04 (1.03, 1.05) | <0.001 | 0.97 (0.95, 0.98) | <0.001 |
| Dialysis                                      | 2.05 (2.00, 2.11) | <0.001 | 1.78 (1.73, 1.83) | <0.001 |
| Drug abuse                                    | 1.05 (1.02, 1.07) | 0.001  | 0.96 (0.94, 0.99) | 0.02   |

|                                                                   |                   |        |  |                   |        |
|-------------------------------------------------------------------|-------------------|--------|--|-------------------|--------|
| Fluid and electrolyte disorders                                   | 1.29 (1.28, 1.31) | <0.001 |  | 1.34 (1.32, 1.35) | <0.001 |
| HIV/AIDS                                                          | 1.21 (1.11, 1.32) | <0.001 |  | 1.14 (1.04, 1.24) | 0.005  |
| Hypertension                                                      | 0.68 (0.67, 0.69) | <0.001 |  | 0.55 (0.54, 0.56) | <0.001 |
| Hypothyroidism                                                    | 0.97 (0.96, 0.98) | <0.001 |  | 0.94 (0.92, 0.95) | <0.001 |
| Ischemic heart disease without recent acute myocardial infarction | N/A               | N/A    |  | 0.85 (0.84, 0.86) | <0.001 |
| Lymphoma                                                          | 1.46 (1.42, 1.50) | <0.001 |  | 1.28 (1.24, 1.33) | <0.001 |
| Metastatic cancer                                                 | 4.48 (4.40, 4.55) | <0.001 |  | 3.21 (3.14, 3.29) | <0.001 |
| Obesity                                                           | 0.80 (0.79, 0.81) | <0.001 |  | 0.76 (0.75, 0.77) | <0.001 |
| Other neurological disorders                                      | 1.10 (1.09, 1.11) | <0.001 |  | 1.01 (1.00, 1.03) | 0.12   |
| Paralysis                                                         | N/A               | N/A    |  | 0.98 (0.95, 1.00) | 0.06   |
| Peripheral vascular disease                                       | 1.09 (1.08, 1.11) | <0.001 |  | 0.99 (0.97, 1.00) | 0.02   |
| Pulmonary circulation disorders                                   | 1.16 (1.14, 1.18) | <0.001 |  | 1.18 (1.16, 1.19) | <0.001 |
| Rheumatoid arthritis/ collagen vascular disease                   | 0.96 (0.94, 0.99) | 0.002  |  | 0.86 (0.84, 0.89) | <0.001 |
| Solid tumor without metastasis                                    | 1.29 (1.28, 1.30) | <0.001 |  | 1.10 (1.09, 1.12) | <0.001 |
| Valvular heart disease                                            | 0.95 (0.94, 0.96) | <0.001 |  | 0.84 (0.83, 0.86) | <0.001 |
| Weight loss                                                       | 1.53 (1.51, 1.55) | <0.001 |  | 1.38 (1.36, 1.40) | <0.001 |
| Medical or surgical events during the six months prior to cohort  |                   |        |  |                   |        |

|                                                                   |                      |        |                      |        |
|-------------------------------------------------------------------|----------------------|--------|----------------------|--------|
| entry                                                             |                      |        |                      |        |
| Acute myocardial infarction/<br>acute coronary syndrome           | 2.07 (2.04,<br>2.10) | <0.001 | 1.91 (1.87,<br>1.95) | <0.001 |
| Coronary artery bypass<br>grafting                                | 0.67 (0.63,<br>0.71) | <0.001 | 0.69 (0.64,<br>0.76) | <0.001 |
| Percutaneous coronary<br>intervention                             | 0.74 (0.71,<br>0.77) | <0.001 | 0.83 (0.79,<br>0.87) | <0.001 |
| Pneumonia                                                         | 3.03 (2.98,<br>3.09) | <0.001 | 2.83 (2.77,<br>2.90) | <0.001 |
| Stroke                                                            | 1.28 (1.26,<br>1.30) | <0.001 | 1.19 (1.17,<br>1.22) | <0.001 |
| Per capita income of residential ZIP code (quartile) <sup>§</sup> |                      |        |                      |        |
| <\$20,661                                                         | Comparator group     |        |                      |        |
| \$20,661 to \$25,407                                              | 0.96 (0.95,<br>0.97) | <0.001 | 0.97 (0.96,<br>0.99) | 0.001  |
| \$25,408 to \$32,209                                              | 0.93 (0.92,<br>0.94) | <0.001 | 0.96 (0.94,<br>0.97) | <0.001 |
| >\$32,209                                                         | 0.88 (0.87,<br>0.90) | <0.001 | 0.94 (0.93,<br>0.96) | <0.001 |

\*Hazard ratio for each additional year of age.

† Federal fiscal years are from October 1 – September 30. The 3<sup>rd</sup> quarter of fiscal year 2010 (i.e., April 1, 2010 – June 30, 2010) was used as the comparison group for the reported hazard ratios.

‡ Percentage calculated as the sum of Medicare-reimbursed provider encounters plus hospital days, divided by the sum of VA and Medicare-reimbursed provider encounters and hospital days, during the calendar quarter.

§ Per capita income (in nominal dollars) from the veteran's residential ZIP Code Tabulation Area as measured in the 2011-2015 American Community Survey conducted by the U.S. Census Bureau.<sup>32</sup>

Abbreviations: IHD—ischemic heart disease; CHF—chronic heart failure; CI—confidence interval; HIV—human immunodeficiency virus; AIDS—acquired immune deficiency syndrome.
